# Supplementary material
Source: PubMed Central journal article supplement (PMC2593385)
Supplement: supp_28_23_7030__1.pdf [file supp_28_23_7030__1.pdf]

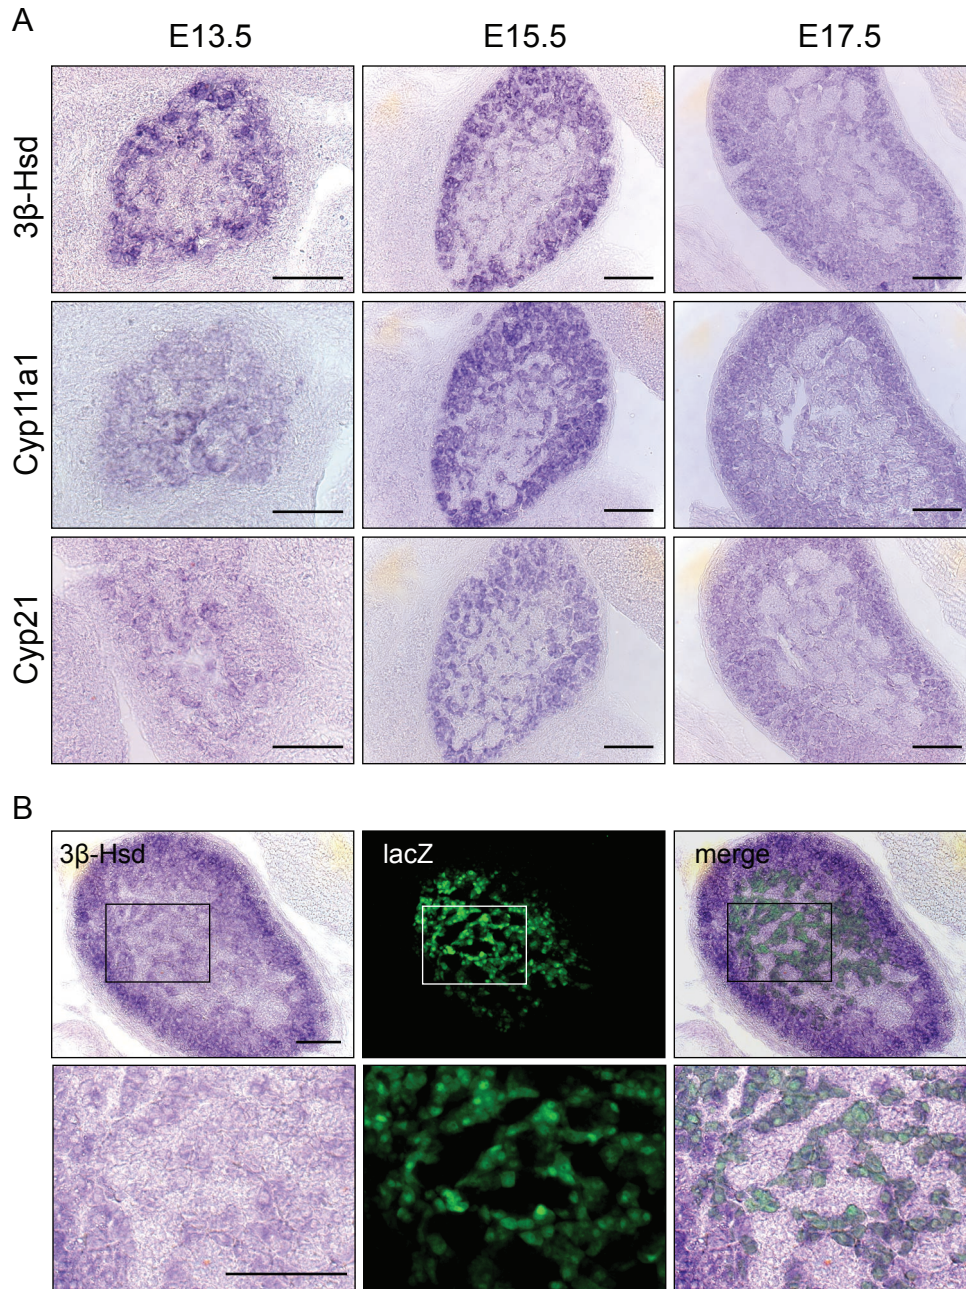

Fig. S1. Expression of steroidogenic markers in the developing adrenal glands. (A) Three steroidogenic markers, 3 $\beta$ -Hsd, Cyp11a1, and Cyp21, were analyzed by in situ hybridization using sections of the adrenal gland prepared from the Ad4BP-lacZ-FAdE Tg fetuses at E13.5, E15.5 and E17.5. Scale bars indicate 100  $\mu$ m. (B) Expression of 3 $\beta$ -Hsd in lacZ positive cells was analyzed by combined in situ hybridization (blue) and immunofluorescence for lacZ (green). Sections of the adrenal gland were prepared from Ad4BP-lacZ-FAdE Tg fetuses at E17.5. The areas enclosed by the rectangles are enlarged in the bottom panels. Scale bars indicate 100  $\mu$ m.
